# Supplementary material
Source: publisher figshare collection journal article supplement (https://tandf.figshare.com/articles/dataset/_/7222001)
Supplement: Supplementary file 1 [file 1]

Table S1: Trade codes per product category

| <b><u>Product category #</u></b> | <b><u>Product category description</u></b>                 | <b><u>HS trade codes assigned to category</u></b>          |
|----------------------------------|------------------------------------------------------------|------------------------------------------------------------|
| 1                                | Iron Ore                                                   | 2601                                                       |
| 2                                | Scrap                                                      | 7204                                                       |
| 3                                | Pig Iron                                                   | 7205; 7201                                                 |
| 4                                | Primary and semi-finished iron, stainless steel and alloys | 7202; 7203; 7206; 7207; 7218; 7224                         |
| 5                                | Basic iron products                                        | 7208; 7209; 7210; 7211; 7212; 7213; 7214; 7215; 7216; 7217 |
| 6                                | Basic stainless-steel products                             | 7219; 7220; 7221; 7222; 7223                               |
| 7                                | Basic alloy products                                       | 7225; 7226; 7227; 7228; 7229                               |
| 14                               | Basic aluminium products                                   | 7604; 7605; 7606                                           |
| 15                               | Intermediate aluminium products                            | 7607; 7608; 7609; 7610; 7611; 7612; 7613; 7614; 7615; 7616 |
| 8                                | Tubes, pipes and related products                          | 7303; 7304; 7305; 7306; 7307                               |
| 10                               | Basic infrastructure and construction products             | 7301; 7302; 7308                                           |
| 11                               | Tanks and related products                                 | 7309; 7310; 7311                                           |
| 9                                | Wire, cloth, chains, nails, needles, springs and related   | 7312; 7313; 7314; 7315; 7316; 7317; 7318; 7319; 7320       |
| 12                               | Simple household articles, sanitary ware and related items | 7321; 7322; 7323; 7324                                     |

|    |                                                                   |                                                            |
|----|-------------------------------------------------------------------|------------------------------------------------------------|
| 13 | Cast and other articles not elsewhere specified                   | 7325; 7326                                                 |
| 20 | Boilers and related products                                      | 8401; 8402; 8403; 8404; 8405; 8406; 8481                   |
| 22 | Piston engines and automotive related parts                       | 8407; 8408; 8409; 8483; 8484; 8485                         |
| 33 | Turbines, turbo-jets and other engines                            | 8410; 8411; 8412                                           |
| 34 | Pumps, air condition machines, refrigerators and related products | 8413; 8414; 8415; 8418                                     |
| 25 | Furnaces, burners and related products                            | 8416; 8417                                                 |
| 23 | Laboratory related equipment                                      | 8419; 8420; 8421                                           |
| 38 | Packaging line equipment and scales                               | 8422; 8423                                                 |
| 32 | Material handling and liquid dispersing machinery                 | 8424; 8425; 8426; 8427; 8428; 8429; 8430; 8431             |
| 39 | Agricultural related machinery                                    | 8432; 8433; 8434; 8435; 8436; 8437; 8438; 8439; 8477; 8478 |
| 43 | Paper, printing and binding related machinery                     | 8440; 8441; 8442; 8443                                     |
| 16 | Textile related machinery                                         | 8444; 8445; 8446; 8447; 8448; 8449; 8450; 8451; 8452; 8453 |
| 35 | Arms and related products                                         | 9301; 9302; 9303; 9304; 9305; 9306; 9307                   |
| 40 | Metal working moulds and machines                                 | 8454; 8455; 8457; 8458                                     |
| 41 | Machine tools                                                     | 8456; 8459; 8460; 8461; 8462; 8463; 8464; 8465; 8466       |
| 42 | Other tools and manufacturing items                               | 8467; 8468; 8475; 8480                                     |
| 17 | Office machinery and vending machines                             | 8469; 8470; 8471; 8472; 8473; 8476                         |
| 26 | Mining related machinery                                          | 8474                                                       |
| 21 | Bearings                                                          | 8482                                                       |

|    |                                            |                                                                  |
|----|--------------------------------------------|------------------------------------------------------------------|
| 37 | Hand tools and related                     | 8201; 8202; 8203; 8204; 8205; 8206; 8207; 8208; 8209; 8210       |
| 36 | Scissors, knives, blades and cutlery       | 8211; 8212; 8213; 8214; 8215                                     |
| 49 | Miscellaneous products of base metal       | 8301; 8302; 8303; 8304; 8305; 8306; 8307; 8308; 8309; 8310; 8311 |
| 19 | Large electric machinery                   | 8501; 8502; 8503; 8504; 8505                                     |
| 18 | Batteries and accumulators                 | 8506; 8507                                                       |
| 44 | Electric appliances                        | 8508; 8509; 8510; 8513; 8514; 8515; 8516; 8517                   |
| 24 | Automotive electric machinery              | 8511; 8512                                                       |
| 46 | Video and sound equipment                  | 8518; 8519; 8520; 8521; 8522; 8523; 8524                         |
| 47 | Radar and signal transmission equipment    | 8525; 8526; 8527; 8528; 8529; 8530; 8531                         |
| 48 | Electrical circuit components              | 8532; 8533; 8534; 8535; 8536; 8537; 8538; 8539; 8540; 8541       |
| 45 | Other electric / electronic related items  | 8542; 8543; 8544; 8545; 8546; 8547; 8548                         |
| 27 | Rolling stock related items                | 8601; 8602; 8603; 8604; 8605; 8606; 8607; 8608; 8609             |
| 30 | Motorised vehicles and components          | 8701; 8702; 8703; 8704; 8705; 8706; 8707; 8708                   |
| 31 | Non-motorised and special purpose vehicles | 8709; 8710; 8711; 8712; 8713; 8714; 8715; 8716                   |
| 29 | Aircraft and related products              | 8801; 8802; 8803; 8804; 8805                                     |
| 28 | Ships and related products                 | 8901; 8902; 8903; 8904; 8905; 8906; 8907; 8908                   |
